# Supplementary material
Source: Springer Nature journal article supplement (https://www.springermedizin.de/resource/supplementary/12914_2004_15_MOESM1_ESM.pdf/9537332)

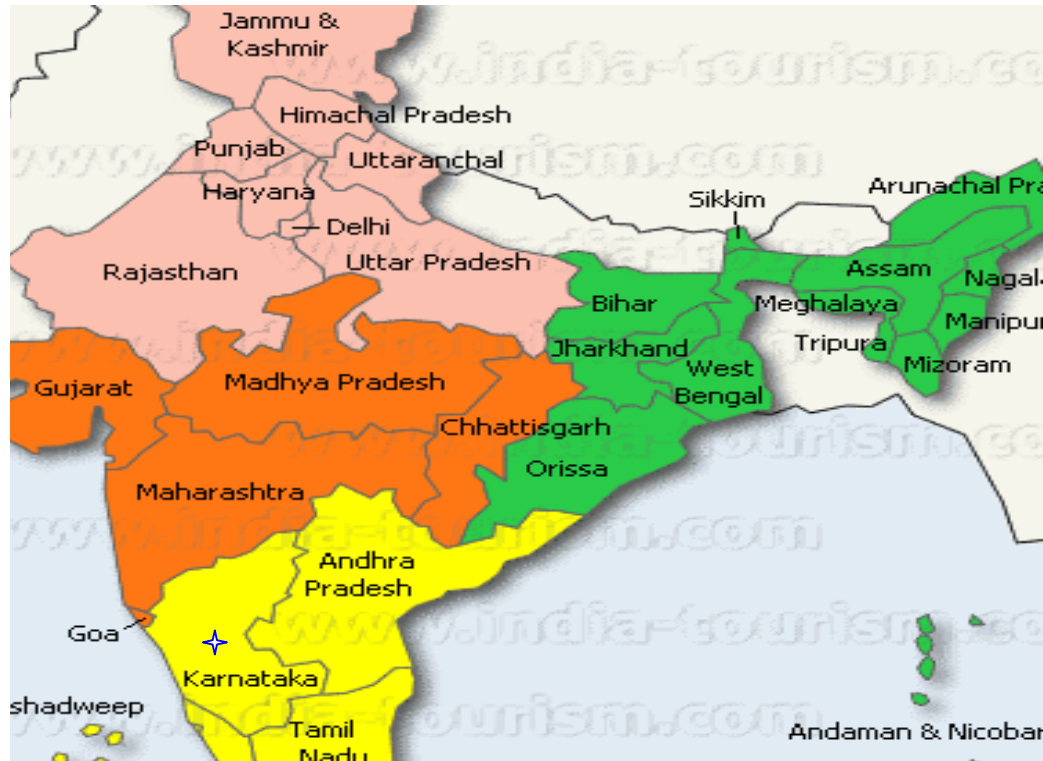

+ Karnataka

Supplement: MOESM1 [file 9537332]
